# Supplementary material
Source: publisher figshare collection journal article supplement (https://sage.figshare.com/ndownloader/files/24233639)
Supplement: Supplementary file 1 [file 24233639]

Table S1. Linear Regression Predicting What Makes an Interaction Meaningful, Including Interaction Terms for Which Prompt People Saw.

|                      |                                  | <i>B</i> | <i>SE B</i> |
|----------------------|----------------------------------|----------|-------------|
| Interaction partner  | Strong tie                       | .16      | .10         |
|                      | Community tie                    | -.01     | .11         |
|                      | Work tie                         | -.03     | .10         |
|                      | Weak tie                         | -.16#    | .09         |
|                      | Number of interaction partners   | .03      | .03         |
| Activity             | Conversing                       | .10      | .08         |
|                      | Eating                           | .08      | .09         |
|                      | Listening to music               | -.06     | .11         |
|                      | Studying                         | .23*     | .11         |
|                      | Celebrating                      | .20#     | .11         |
|                      | Exercising                       | .14      | .11         |
|                      | Other activities                 | .36***   | .09         |
| Planned              |                                  | .31***   | .09         |
| Memorialized         |                                  | .12      | .10         |
| Communication medium | Phone/Voice call                 | .19      | .12         |
|                      | Video call                       | .05      | .16         |
|                      | Text message/Instant message/SMS | .07      | .12         |
|                      | In Person                        | -.16     | .10         |
|                      | Email                            | .08      | .15         |
|                      | Mail                             | -.23     | .20         |
|                      | Social media/social network site | -.05     | .11         |
|                      | Other                            | -.05     | .16         |
| Synchronicity        |                                  | .19*     | .10         |
| Prompt               |                                  | .40***   | .10         |
| Men                  |                                  | -.14***  | .03         |
| Age (30-44 omitted)  | 13-17 years old                  | .03      | .04         |
|                      | 18-29 years old                  | -.12**   | .05         |
|                      | 45-64 years old                  | .16***   | .04         |
|                      | 65+ years old                    | .17*     | .07         |
| Has a child under 18 |                                  | .07#     | .04         |
| Internet use daily   |                                  | .11*     | .04         |
| Country (US omitted) | India                            | .09*     | .04         |
|                      | Japan                            | .08*     | .04         |
| Interaction partner  | Strong tie * prompt              | .01      | .07         |
|                      | Community tie * prompt           | .08      | .08         |

|                      |                                           |         |     |
|----------------------|-------------------------------------------|---------|-----|
|                      | Work tie * prompt                         | -.06    | .07 |
|                      | Weak tie * prompt                         | .09     | .07 |
|                      | Number of interaction partners * prompt   | -.02    | .02 |
| Activity             | Conversing * prompt                       | .03     | .06 |
|                      | Eating * prompt                           | -.01    | .06 |
|                      | Listening to music * prompt               | .08     | .08 |
|                      | Studying * prompt                         | -.08    | .07 |
|                      | Celebrating * prompt                      | -.04    | .08 |
|                      | Exercising * prompt                       | -.04    | .08 |
|                      | Other activities * prompt                 | -.19**  | .06 |
|                      | Planned * prompt                          | -.11#   | .06 |
|                      | Memorialized * prompt                     | -.04    | .07 |
| Communication medium | Phone/Voice call * prompt                 | -.12    | .09 |
|                      | Video call * prompt                       | -.05    | .11 |
|                      | Text message/Instant message/SMS * prompt | -.02    | .09 |
|                      | In Person * prompt                        | .09     | .07 |
|                      | Email * prompt                            | -.05    | .11 |
|                      | Mail * prompt                             | .17     | .15 |
|                      | Social media/social network site * prompt | .06     | .08 |
|                      | Other * prompt                            | -.06    | .11 |
|                      | Synchronicity * prompt                    | -.04    | .07 |
|                      | Intercept                                 | 2.94*** | .15 |
|                      | Adjusted R2                               |         | .11 |

---

# < .1. \* p < .05. \*\* p < .01. \*\*\* p < .001.

Table S2. Codebook for What are Meaningful Social Interactions in Today's Technology-Mediated World?

| Theme        |                  | Description                                                                                  | Codes                                                                                                                                                                                                                                                                                                                                                                                                         | Example of code present                                                                |
|--------------|------------------|----------------------------------------------------------------------------------------------|---------------------------------------------------------------------------------------------------------------------------------------------------------------------------------------------------------------------------------------------------------------------------------------------------------------------------------------------------------------------------------------------------------------|----------------------------------------------------------------------------------------|
| <i>Codes</i> |                  |                                                                                              |                                                                                                                                                                                                                                                                                                                                                                                                               |                                                                                        |
| People       |                  | The person describes an individual as part of the interaction.                               | 2 = survey response acknowledged person and linked person with meaningfulness                                                                                                                                                                                                                                                                                                                                 | <i>"It was with my mom and I love her." (code 2)</i>                                   |
|              |                  |                                                                                              | 1 = survey response acknowledged person, but made no link with meaningfulness<br>0 = person not referenced at all                                                                                                                                                                                                                                                                                             |                                                                                        |
| Activities   |                  | The person describes an activity, interest, topic, or experience as part of the interaction. | 2 = survey response acknowledged activity and linked activity with meaningfulness                                                                                                                                                                                                                                                                                                                             | <i>"Playing games on line with friends...I was doing some thin[g]I like." (code 2)</i> |
|              |                  |                                                                                              | 1 = survey response acknowledged activity, but made no link with meaningfulness<br>0 = activity not referenced at all                                                                                                                                                                                                                                                                                         |                                                                                        |
| Impact       | Impact (Overall) | The person describes having experienced impact or lack of impact.                            | 1 = survey response acknowledged interaction led to impact, such as a change in something like emotions, information, or something more tangible<br>0 = impact not referenced at all<br>-1 = survey response acknowledged that the interaction lacked impact, such as a lack of change in something like emotions, information, or something more tangible (e.g., mundane, trivial, small, repetitive, basic) | <i>"Talked to the lady at the gas station...Just killing time." (code -1)</i>          |

|                      |                                                                                                                                                                                     |                                                                                                                                                                                                                                                                                                                                                                                                                          |                                                                                                                                                                                                                 |
|----------------------|-------------------------------------------------------------------------------------------------------------------------------------------------------------------------------------|--------------------------------------------------------------------------------------------------------------------------------------------------------------------------------------------------------------------------------------------------------------------------------------------------------------------------------------------------------------------------------------------------------------------------|-----------------------------------------------------------------------------------------------------------------------------------------------------------------------------------------------------------------|
| Emotional Impact     | The person describes the interaction as leading to emotions such as empathy, sadness, authenticity, or love. As a result, they felt different or their relationship changed.        | <p>3 = survey response acknowledged interaction led to negative emotional impact</p> <p>2 = survey response acknowledged interaction led to both positive and negative emotional impact</p> <p>1 = survey response acknowledged interaction led to positive emotional impact</p> <p>0 = emotional impact not referenced at all</p> <p>-1 = survey response acknowledged that the interaction lacked emotional impact</p> | <p><i>“A co-worker asked if I would like to get together out of the blue...It made me feel good about myself and the relationship between me and the other person.” (code 1)</i></p>                            |
| Informational Impact | The person describes the interaction as teaching, advice-giving, disclosing, discussing, or instructive so that they or someone else developed a better understanding of something. | <p>1 = survey response acknowledged interaction led to informational impact</p> <p>0 = informational impact not referenced at all</p> <p>-1 = survey response acknowledged that the interaction lacked informational impact</p>                                                                                                                                                                                          | <p><i>“Meeting with the Language experts...[it] added knowledge and new dimensions to the subject.” (code 1)</i></p>                                                                                            |
| Tangible Impact      | The person describes the interaction as providing goods or services so that they or someone else gained something physically in life.                                               | <p>1 = survey response acknowledged interaction led to tangible impact</p> <p>0 = tangible impact not referenced at all</p> <p>-1 = survey response acknowledged that the interaction lacked tangible impact</p>                                                                                                                                                                                                         | <p><i>“I met with my scheduler and a new client to accustom him to my being his caretaker... I could help this client maintain his life at home instead of having to move to a care facility.” (code 1)</i></p> |
